# Supplementary material
Source: PubMed Central journal article supplement (PMC8159868)
Supplement: NIHMS1680640-supplement-Supplemental_Digital_Content.pdf [file NIHMS1680640-supplement-Supplemental_Digital_Content.pdf]

## Supplemental Materials

Long-term exposure to PM<sub>2.5</sub> and mortality for the older population: Effect modification by residential greenness

### Table of Contents

eTable 1. Correlations between selected variables in NC

eTable 2. Correlations between selected variables in MI

eTable 3. Associations between long-term exposure to PM<sub>2.5</sub> and total mortality across greenness groups in urbanized areas (UAs) in NC and MI

eTable 4. Associations between long-term exposure to PM<sub>2.5</sub> and total mortality across greenness groups in urban clusters (UCs) in NC and MI

eTable 5. Associations between long-term exposure to PM<sub>2.5</sub> and total mortality across greenness groups in rural areas in NC and MI

eTable 6. Associations between long-term exposure to PM<sub>2.5</sub> and total mortality across greenness groups in each urbanicity areas (urbanized, urban clusters, and rural areas) based on state-specific cutoff for tertiles for greenness group in NC and MI

eTable 7. Associations between long-term exposure to PM<sub>2.5</sub> and total mortality by combined disparities of greenness and SES in NC and MI

eTable 8. Distribution of PM<sub>2.5</sub> concentration by greenness using the subset of areas with PM<sub>2.5</sub> monitors based on state-specific cutoff for tertiles for greenness group

eTable 9. Sensitivity analysis results (HR for mortality for 1  $\mu\text{g}/\text{m}^3$   $\text{PM}_{2.5}$ ) using the subset of areas with both  $\text{PM}_{2.5}$  monitor values and  $\text{PM}_{2.5}$  estimates based on the state-specific cutoff for tertiles for greenness group

eTable 10. Sensitivity analysis results (HR for mortality for 1  $\mu\text{g}/\text{m}^3$   $\text{PM}_{2.5}$ ) using the same cutoffs for tertiles of greenness across states

eTable 11. Associations between long-term exposure to  $\text{PM}_{2.5}$  and total mortality across greenness groups in each urbanicity areas (urbanized, urban clusters, and rural areas) based on same cutoffs for tertiles of greenness across states

eFigure 1. Causal diagram of relationships between air pollution, greenness, socioeconomic status, and mortality





eTable 3. Associations between long-term exposure to PM<sub>2.5</sub> and total mortality across greenness groups in urbanized areas (UAs) in NC and MI

|           | HR (95% CI)         |                     |
|-----------|---------------------|---------------------|
|           | NC                  | MI                  |
| Total     | 1.059 (1.049-1.068) | 0.968 (0.957-0.978) |
| Greenness |                     |                     |
| Low       | 1.094 (1.077-1.111) | 1.022 (1.006-1.038) |
| Medium    | 1.022 (1.006-1.040) | 0.949 (0.932-0.967) |
| High      | 1.024 (1.006-1.043) | 0.997 (0.958-1.037) |

HR calculated per 1 µg/m<sup>3</sup> for PM<sub>2.5</sub>; Models were stratified by greenness groups.

State-specific cutoffs for greenness group: low (<0.60), medium (0.60-0.64), and high (≥0.64) for NC; low (<0.42), medium (0.42-0.49), and high (≥0.49) for MI

N for NC 753,466 persons and MI 890,104 persons

N for urbanized areas: low greenness group 246,298 persons, medium greenness group 253,033 persons, and high greenness group 254,135 persons for NC; low greenness group 297,613 persons, medium greenness group 296,951 persons, and high greenness group 295,540 persons for MI

eTable 4. Associations between long-term exposure to PM<sub>2.5</sub> and total mortality across greenness groups in urban clusters (UCs) in NC and MI

|           | HR (95% CI)         |                     |
|-----------|---------------------|---------------------|
|           | NC                  | MI                  |
| Total     | 1.161 (1.148-1.174) | 1.067 (1.053-1.082) |
| Greenness | 1.134 (1.111-1.158) | 1.056 (1.036-1.076) |
| Low       |                     |                     |
| Medium    | 1.279 (1.250-1.309) | 0.978 (0.944-1.014) |
| High      | 0.999 (0.975-1.023) | 0.964 (0.935-0.995) |

HR calculated per 1  $\mu\text{g}/\text{m}^3$  for PM<sub>2.5</sub>; Models were stratified by greenness groups.

State-specific cutoffs for greenness group: low (<0.62), medium (0.62-0.66), and high ( $\geq$ 0.66) for NC; low (<0.48), medium (0.48-0.51), and high ( $\geq$ 0.51) for MI

N for NC 335,626 persons and MI 228,528 persons

N for urban clusters: low greenness group 110,732 persons, medium greenness group 111,905 persons, and high greenness group 112,989 persons for NC; low greenness group 77,401 persons, medium greenness group 77,344 persons, and high greenness group 73,783 persons for MI

eTable 5. Associations between long-term exposure to PM<sub>2.5</sub> and total mortality across greenness groups in rural areas in NC and MI

|           | HR (95% CI)         |                     |
|-----------|---------------------|---------------------|
|           | NC                  | MI                  |
| Total     | 1.155 (1.139-1.172) | 1.035 (1.022-1.048) |
| Greenness | 1.117 (1.093-1.140) | 1.053 (1.035-1.072) |
| Low       |                     |                     |
| Medium    | 1.166 (1.131-1.202) | 0.895 (0.863-0.929) |
| High      | 1.040 (1.006-1.076) | 0.971 (0.941-1.001) |

HR calculated per 1 µg/m<sup>3</sup> for PM<sub>2.5</sub>; Models were stratified by greenness groups.

State-specific cutoffs for greenness group: low (<0.65), medium (0.65-0.67), and high (≥0.67) for NC; low (<0.48), medium (0.48-0.51), and high (≥0.51) for MI

N for NC 174,597 persons and MI 199,926 persons

N for rural areas: low greenness group 59,014 persons, medium greenness group 57,096 persons, and high greenness group 58,487 persons for NC; low greenness group 66,788 persons, medium greenness group 66,375 persons, and high greenness group 66,763 persons for MI

eTable 6. Associations between long-term exposure to PM<sub>2.5</sub> and total mortality across greenness groups in each urbanicity areas (urbanized, urban clusters, and rural areas) based on state-specific cutoff for tertiles for greenness group in NC and MI

|                               |        | HR for mortality for 1 µg/m <sup>3</sup> PM <sub>2.5</sub> (95% CI) |                     |
|-------------------------------|--------|---------------------------------------------------------------------|---------------------|
|                               |        | NC                                                                  | MI                  |
| <b><i>Urbanized areas</i></b> |        |                                                                     |                     |
| Total                         |        | 1.059 (1.049-1.068)                                                 | 0.968 (0.957-0.978) |
| Greenness                     |        |                                                                     |                     |
|                               | Low    | 1.092 (1.077-1.107)                                                 | 1.025 (1.011-1.038) |
|                               | Medium | 1.035 (1.018-1.053)                                                 | 0.788 (0.769-0.807) |
|                               | High   | 0.869 (0.847-0.891)                                                 | 0.913 (0.873-0.955) |
| <b><i>Urban clusters</i></b>  |        |                                                                     |                     |
| Total                         |        | 1.161 (1.148-1.174)                                                 | 1.067 (1.053-1.082) |
| Greenness                     |        |                                                                     |                     |
|                               | Low    | 1.165 (1.137-1.194)                                                 | 1.092 (1.060-1.124) |
|                               | Medium | 1.286 (1.260-1.312)                                                 | 1.036 (1.012-1.060) |
|                               | High   | 1.023 (1.001-1.044)                                                 | 0.875 (0.852-0.899) |
| <b><i>Rural areas</i></b>     |        |                                                                     |                     |
| Total                         |        | 1.155 (1.139-1.172)                                                 | 1.035 (1.022-1.048) |
| Greenness                     |        |                                                                     |                     |
|                               | Low    | 1.104 (1.067-1.144)                                                 | 1.055 (1.026-1.085) |
|                               | Medium | 1.175 (1.142-1.208)                                                 | 0.991 (0.967-1.015) |
|                               | High   | 1.106 (1.082-1.130)                                                 | 0.925 (0.904-0.948) |

Models were stratified by greenness groups.

State-specific cutoffs for greenness group: low (<0.61), medium (0.61-0.65), and high (≥0.65) for NC; low (<0.45), medium (0.45-0.49), and high (≥0.49) for MI

N for urbanized areas: low greenness group 316,191 persons, medium greenness group 272,721 persons, and high greenness group 164,554 persons for NC

N for urban clusters: low greenness group 78,923 persons, medium greenness group 114,540 persons, and high greenness group 142,163 persons for NC



N for rural areas: low greenness group 23,587 persons, medium greenness group 35,877 persons, and high greenness group 115,133 persons for NC

N for urbanized areas: low greenness group 396,259 persons, medium greenness group 271,921 persons, and high greenness group 221,924 persons for MI

N for urban clusters: low greenness group 19,203 persons, medium greenness group 96,218 persons, and high greenness group 113,107 persons for MI

N for rural areas: low greenness group 23,443 persons, medium greenness group 69,347 persons, and high greenness group 107,136 persons for MI

eTable 7. Associations between long-term exposure to PM<sub>2.5</sub> and total mortality by combined disparities of greenness and SES in NC and MI

|           |         |  | Greenness           |                     |
|-----------|---------|--|---------------------|---------------------|
|           |         |  | Low                 | High                |
| <i>NC</i> |         |  |                     |                     |
| SES       | Lowest  |  | 1.149 (1.129-1.170) | 1.023 (1.004-1.043) |
|           | Highest |  | 1.051 (1.024-1.079) | 0.918 (0.862-0.978) |
| <i>MI</i> |         |  |                     |                     |
| SES       | Lowest  |  | 1.014 (0.999-1.029) | 0.965 (0.943-0.987) |
|           | Highest |  | 0.984 (0.934-1.036) | 0.817 (0.758-0.879) |

HR calculated per 1 µg/m<sup>3</sup> for PM<sub>2.5</sub>; SES group was based on the lowest and highest quartiles of median household income.

eTable 8. Distribution of PM<sub>2.5</sub> concentration by greenness using the subset of areas with PM<sub>2.5</sub> monitors based on state-specific cutoff for tertiles for greenness group

| PM <sub>2.5</sub>                | Greenness Levels | Mean  | SD   | Min  | 25%  | 50%  | 75%   | Max   | IQR  |
|----------------------------------|------------------|-------|------|------|------|------|-------|-------|------|
| <i>NC</i>                        |                  |       |      |      |      |      |       |       |      |
| PM <sub>2.5</sub> Estimates      | Total            | 9.57  | 1.94 | 4.24 | 8.55 | 9.23 | 10.24 | 15.73 | 1.69 |
|                                  | Low              | 10.20 | 1.94 | 5.41 | 8.75 | 9.44 | 11.28 | 15.73 | 2.53 |
|                                  | Medium           | 9.72  | 1.77 | 4.53 | 8.55 | 9.22 | 10.29 | 15.31 | 1.74 |
|                                  | High             | 8.81  | 1.85 | 4.24 | 8.11 | 9.07 | 9.49  | 15.12 | 1.37 |
| PM <sub>2.5</sub> Monitor values | Total            | 9.67  | 2.09 | 4.22 | 8.53 | 8.95 | 10.53 | 16.00 | 2.00 |
|                                  | Low              | 10.00 | 2.28 | 5.32 | 8.40 | 9.22 | 11.45 | 15.90 | 3.05 |
|                                  | Medium           | 9.80  | 2.01 | 4.28 | 8.55 | 9.12 | 10.63 | 15.90 | 2.08 |
|                                  | High             | 9.23  | 1.89 | 4.22 | 8.53 | 8.90 | 9.40  | 16.00 | 0.87 |
| <i>MI</i>                        |                  |       |      |      |      |      |       |       |      |
| PM <sub>2.5</sub> Estimates      | Total            | 9.61  | 1.63 | 3.49 | 8.50 | 9.37 | 10.02 | 17.33 | 1.52 |
|                                  | Low              | 10.11 | 2.06 | 4.40 | 8.84 | 9.70 | 11.14 | 17.33 | 2.30 |
|                                  | Medium           | 9.47  | 1.44 | 5.31 | 8.45 | 9.27 | 9.94  | 16.48 | 1.50 |
|                                  | High             | 9.22  | 1.09 | 3.49 | 8.49 | 9.24 | 9.64  | 16.03 | 1.14 |
| PM <sub>2.5</sub> Monitor values | Total            | 9.64  | 1.76 | 3.48 | 8.65 | 9.53 | 9.90  | 19.85 | 1.25 |
|                                  | Low              | 10.24 | 2.21 | 3.48 | 8.84 | 9.87 | 11.33 | 19.85 | 2.49 |
|                                  | Medium           | 9.40  | 1.53 | 5.92 | 8.51 | 9.35 | 9.64  | 19.85 | 1.13 |
|                                  | High             | 9.26  | 1.19 | 4.63 | 8.65 | 9.37 | 9.61  | 16.24 | 0.96 |

State-specific cutoffs for greenness group: low (<0.61), medium (0.61-0.65), and high (≥0.65) for NC; low (<0.44), medium (0.44-0.49), and high (≥0.49) for MI

N for low greenness group 86,956 persons, medium greenness group 93,385 persons, and high greenness group 90,378 persons for NC

N for low greenness group 114,000 persons, medium greenness group 109,678 persons, and high greenness group 112,027 persons for MI

eTable 9. Sensitivity analysis results (HR for mortality for 1  $\mu\text{g}/\text{m}^3$   $\text{PM}_{2.5}$ ) using the subset of areas with both  $\text{PM}_{2.5}$  monitor values and  $\text{PM}_{2.5}$  estimates based on the state-specific cutoff for tertiles for greenness group

|                                        |        | HR (95% CI)         |                     |
|----------------------------------------|--------|---------------------|---------------------|
|                                        |        | NC                  | MI                  |
| <b>PM<sub>2.5</sub> estimates</b>      |        |                     |                     |
|                                        | Total  | 1.124 (1.115-1.134) | 1.045 (1.035-1.056) |
| <b>Greenness</b>                       |        |                     |                     |
|                                        | Low    | 1.052 (1.036-1.069) | 0.958 (0.943-0.973) |
|                                        | Medium | 1.133 (1.117-1.150) | 1.001 (0.981-1.022) |
|                                        | High   | 1.024 (1.006-1.043) | 1.151 (1.119-1.185) |
| <b>PM<sub>2.5</sub> monitor values</b> |        |                     |                     |
|                                        | Total  | 1.120 (1.111-1.129) | 1.042 (1.034-1.051) |
| <b>Greenness</b>                       |        |                     |                     |
|                                        | Low    | 1.035 (1.021-1.049) | 0.996 (0.986-1.007) |
|                                        | Medium | 1.144 (1.129-1.159) | 1.036 (1.018-1.054) |
|                                        | High   | 1.133 (1.115-1.151) | 1.131 (1.105-1.158) |

Models were stratified by greenness groups.

State-specific cutoffs for greenness group: low ( $<0.61$ ), medium (0.61-0.65), and high ( $\geq 0.65$ ) for NC; low ( $<0.44$ ), medium (0.44-0.49), and high ( $\geq 0.49$ ) for MI

N for low greenness group 86,956 persons, medium greenness group 93,385 persons, and high greenness group 90,378 persons for NC

N for low greenness group 114,000 persons, medium greenness group 109,678 persons, and high greenness group 112,027 persons for MI

eTable 10. Sensitivity analysis results (HR for mortality for 1  $\mu\text{g}/\text{m}^3$   $\text{PM}_{2.5}$ ) using the same cutoffs for tertiles of greenness across states

|                                                       |        | HR (95% CI)         |                      |
|-------------------------------------------------------|--------|---------------------|----------------------|
|                                                       |        | NC                  | MI                   |
| Original findings using state-specific cutoffs        |        |                     |                      |
| Total                                                 |        | 1.124 (1.117-1.130) | 1.007 (1.001-1.013)  |
| Greenness                                             |        |                     |                      |
|                                                       | Low    | 1.104 (1.093-1.116) | 1.063 (1.053-1.074)  |
|                                                       | Medium | 1.183 (1.171-1.196) | 0.929 (0.918-0.940)  |
|                                                       | High   | 0.978 (0.966-0.991) | 0.957 (0.944-0.971)  |
| Sensitivity analysis using same cutoffs across states |        |                     |                      |
| Total                                                 |        | 1.124 (1.117-1.130) | 1.007 (1.001-1.013)  |
| Greenness                                             |        |                     |                      |
|                                                       | Low    | 1.006 (0.975-1.039) | 1.033 (1.026-1.041)  |
|                                                       | Medium | 1.129 (1.116-1.141) | 0.957 (0.944-0.969)  |
|                                                       | High   | 1.130 (1.122-1.139) | 0.076 (0.000-21.072) |

Models were stratified by greenness groups.

State-specific cutoff for greenness group: low ( $<0.61$ ), medium ( $0.61-0.65$ ), and high ( $\geq 0.65$ ) for NC; low ( $<0.45$ ), medium ( $0.45-0.49$ ), and high ( $\geq 0.49$ ) for MI

Same cutoffs across states: low ( $<0.49$ ), medium ( $0.49-0.61$ ), and high ( $\geq 0.61$ ) for both states

State-specific: N for low 418,701 persons, medium 423,138 persons, and high greenness 421,850 persons for NC; low 438,905 persons, medium 437,486 persons, and high greenness 442,167 persons for MI

Same cutoffs: N for low 54,110 persons, medium 350,389 persons, and high greenness 859,190 persons for NC; low 802,784 persons, medium 515,717 persons, and high greenness 57 persons for MI

eTable 11. Associations between long-term exposure to PM<sub>2.5</sub> and total mortality across greenness groups in each urbanicity areas (urbanized, urban clusters, and rural areas) based on same cutoffs for tertiles of greenness across states

|                               | HR for mortality for 1 µg/m <sup>3</sup> PM <sub>2.5</sub> (95% CI) |                      |
|-------------------------------|---------------------------------------------------------------------|----------------------|
|                               | NC                                                                  | MI                   |
| <b><i>Urbanized areas</i></b> |                                                                     |                      |
| Total                         | 1.059 (1.049-1.068)                                                 | 0.968 (0.957-0.978)  |
| Greenness                     |                                                                     |                      |
| Low                           | 0.974 (0.929-1.022)                                                 | 1.016 (1.005-1.028)  |
| Medium                        | 1.118 (1.102-1.135)                                                 | 0.971 (0.931-1.012)  |
| High                          | 1.034 (1.021-1.047)                                                 | -                    |
| <b><i>Urban clusters</i></b>  |                                                                     |                      |
| Total                         | 1.161 (1.148-1.174)                                                 | 1.067 (1.053-1.082)  |
| Greenness                     |                                                                     |                      |
| Low                           | 0.958 (0.862-1.064)                                                 | 1.098 (1.079-1.118)  |
| Medium                        | 1.212 (1.177-1.247)                                                 | 0.897 (0.874-0.919)  |
| High                          | 1.159 (1.143-1.174)                                                 | 0.670 (0.049-9.189)  |
| <b><i>Rural areas</i></b>     |                                                                     |                      |
| Total                         | 1.155 (1.139-1.172)                                                 | 1.035 (1.022-1.048)  |
| Greenness                     |                                                                     |                      |
| Low                           | 0.943 (0.826-1.075)                                                 | 1.058 (1.040-1.076)  |
| Medium                        | 1.175 (1.125-1.227)                                                 | 0.892 (0.872-0.913)  |
| High                          | 1.170 (1.151-1.189)                                                 | 0.123 (0.000-63.014) |

Models were stratified by greenness groups.

Cutoff for greenness group: low (<0.49), medium (0.49-0.61), and high (≥0.61) for both states and all urbanicity groups

N for urbanized areas: low greenness 34,560 persons, medium greenness 271,546 persons, and high greenness 447,360 persons for NC

N for urban clusters: low greenness 15,049 persons, medium greenness 61,435 persons, and high greenness 259,142 persons for NC

N for rural areas: low greenness 4,501 persons, medium greenness 17,408 persons, and high greenness 152,688 persons for NC

N for urbanized areas: low greenness 624,143 persons, medium greenness 265,961 persons, and high greenness 0 person for MI

N for urban clusters: low greenness 103,166 persons, medium greenness 125,335 persons, and high greenness 27 persons for MI

N for rural areas: low greenness 75,475 persons, medium greenness 124,421 persons, and high greenness 30 persons for MI



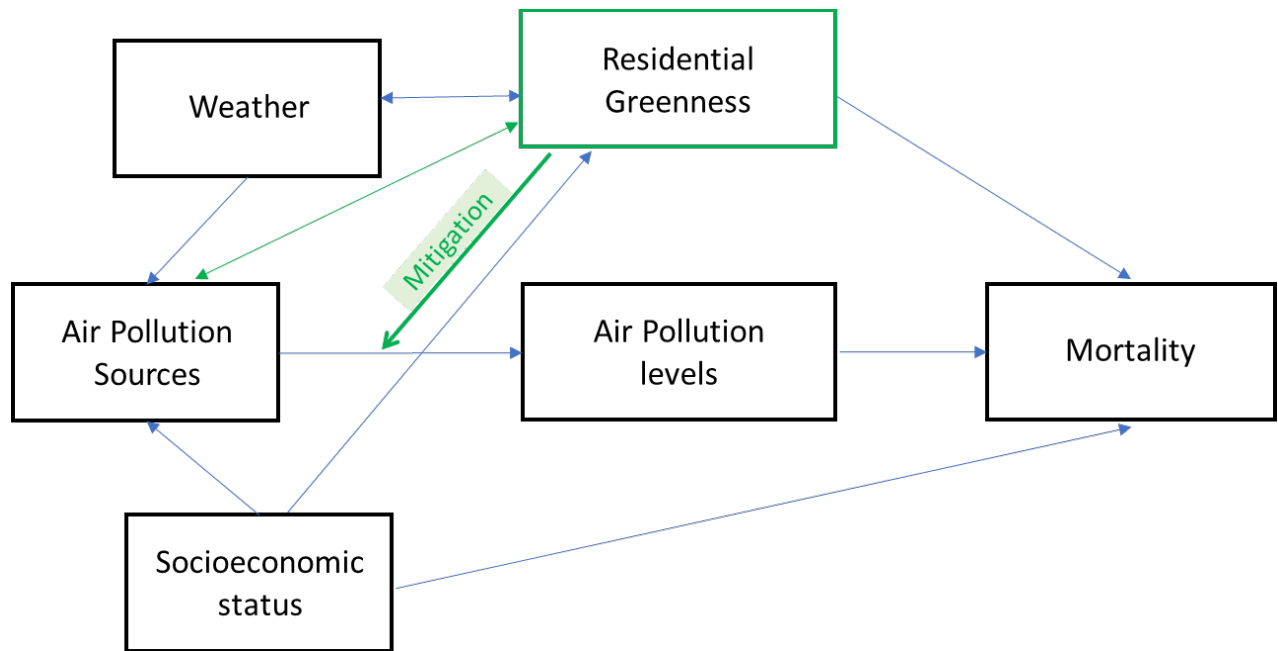

eFigure 1. Causal diagram of relationships between air pollution, greenness, socioeconomic status, and mortality
